# Supplementary material
Source: publisher figshare collection journal article supplement (https://asha.figshare.com/articles/dataset/_/8637206)
Supplement: Supplementary file 1 [file 1]

## **Supplemental Material S1. Strategies used to search each database.**

### **MEDLINE FINAL SEARCH STRATEGY: MARCH 18, 2018**

#### **Limits (2008–2018; English language)**

1. (MM "Multilingualism")
2. bilingual\* OR "English language learner" OR "English learner" OR "limited english proficient" OR "culturally and linguistically diverse" OR "second language"
3. S1 OR S2
4. (MM "Language Development Disorders") OR (MM "Language Disorders") OR (MM "Child Language")
5. language W2 (disorder OR delay OR impairment OR problem OR difficulty OR difficulties OR challenge OR challenges)
6. expressive W2 (disorder OR delay OR impairment OR problem OR difficulty OR difficulties OR challenge OR challenges)
7. receptive W2 (disorder OR delay OR impairment OR problem OR difficulty OR difficulties OR challenge OR challenges)
8. (express\* OR recept\* OR grammar\* OR vocab\* OR semantic\* OR word-order OR "word order" OR morpholog\* OR "word meaning" OR syntax OR lexicon OR "sentence structure" OR "story-telling" OR "story telling" OR "story structure" OR microstructure OR macrostructure) OR ("code?mixing" OR code?switching OR code?mesing OR translanguag\*)
9. S4 OR S5 OR S6 OR S7 OR S8
10. (MM "Child, Preschool")
11. preschool\* OR pre-school\* OR toddler\* OR child\*
12. S10 OR S11
13. (MM "Language Tests")
14. assess\* OR measure\* OR test\* OR evaluat\* OR characteriz\* OR distinguish\* OR differentiat\* OR discriminat\*
15. S13 OR S14
16. S3 AND S13 AND S16 AND S19

### **CINAHL FINAL SEARCH STRATEGY: MARCH 10, 2018**

#### **Limits (2008–2018; English language)**

1. (MM "English as a Second Language") OR (MM "Multilingualism")
2. bilingual\* OR dual languag\* OR English language learn\* OR limited English proficien\* OR "culturally and linguistically diverse" OR second language\*
3. S1 OR S2
4. (MM "Language Development") OR (MM "Language Disorders")
5. (language N1 (disorder\* OR delay\* OR impairment\* OR problem\* OR difficult\* OR challeng\*) OR difference OR code-mix\* OR code mix OR code mesh OR code-mesh\* OR translanguag\*) OR (expressive N2 (disorder\* OR delay\* OR impairment\* OR problem\* OR difficult\* OR challeng\*) OR difference OR code-mix\* OR code mix OR code mesh OR code-mesh\* OR translanguag\*) OR (receptive N2 (disorder\* OR delay\* OR impairment\* OR problem\* OR difficult\* OR challeng\*) OR difference OR code-mix\* OR code-mesh\* OR translanguag\*)

6. express\* OR recept\* OR grammar\* OR vocab\* OR semantic\* OR word-order OR word order OR morpholog\* OR word meaning OR syntax OR lexicon OR "sentence structure" OR narrat\* OR "story-telling" OR "story telling" OR "story structure" OR microstructure OR macrostructure
7. **S4 OR 5 OR 6**
8. (MM "Child, preschool")
9. preschool\* OR pre-school\* OR toddler\* OR child\*
10. **8 OR 9**
11. (MM "Speech and Language Assessment")
12. assess\* OR measure\* OR test\* OR evaluat\* OR characteriz\* OR distinguish\* OR differentiat\* OR discriminat\*
13. **11 OR 12**
14. **3 AND 7 AND 10 AND 13**

## **ERIC FINAL SEARCH STRATEGY: MARCH 9, 2018**

### **Limits (2008–2018; English language; peer-reviewed; academic journals)**

1. DE "Multilingualism" OR DE "Bilingualism" OR DE "English (Second Language)" OR DE "Language Dominance"
2. (bilingual\* OR dual languag\* OR English language learn\* OR limited English proficien\* OR "culturally and linguistically diverse" OR second languag\*)
3. **S1 OR S2**
4. DE "Expressive Language" OR DE "Child Language" OR DE "Oral Language" OR DE "Verbal Communication" OR DE "Language Impairments" OR DE "Language Skills" OR DE "Communicative Competence (Languages)" OR DE "Vocabulary Skills" OR DE "Language Acquisition") OR (DE "Language Impairments") OR DE "Communication Disorders"
5. (language N1 (disorder\* OR delay\* OR impairment\* OR problem\* OR difficult\* OR challeng\* OR difference) OR (expressive N2 (disorder\* OR delay\* OR impairment\* OR problem\* OR difficult\* OR challeng\* OR (receptive N2 (disorder\* OR delay\* OR impairment\* OR problem\* OR difficult\* OR challeng\* OR difference)
6. grammar\* OR vocab\* OR semantic\* OR word-order OR word order OR morpholog\* OR word meaning OR syntax OR lexicon OR "sentence structure" OR narrat\* OR "story-telling" OR "story telling" OR "story structure" OR microstructure OR macrostructure OR "code?mixing" OR "code?meshing" OR code?switching" OR translanguag\*
7. **S4 OR S5 OR S6**
8. DE "Preschool Children" OR DE "Toddlers"
9. preschool\* OR pre-school\* OR toddler OR child\*
10. **S8 OR S9**
11. (((DE "Standardized Tests" OR DE "Student Evaluation" OR DE "Curriculum Based Assessment" OR DE "Progress Monitoring" OR DE "Academic Records" OR DE "Alternative Assessment" OR DE "Classroom Observation Techniques" OR DE "Informal Assessment" OR DE "Performance Based Assessment" OR DE "Portfolio Assessment" OR DE "Response to Intervention" OR DE "Scoring Rubrics") OR (DE "Testing")) OR (DE "Language Tests")) OR (DE "Diagnostic Tests")) OR (DE "Preschool Tests")
12. assess\* or measure\* or test\* or evaluat\* or characteriz\* or distinguish\* or differentiat\* or discriminat\*
13. **S11 OR S12**

#### 14. S3 AND S7 AND S10 AND S163

### PSYCINFO FINAL SEARCH STRATEGY: MARCH 19, 2018

#### Limits (2008–2018; English; academic journals)

1. MM "Multilingualism" OR MM "Bilingualism" OR MM "English as Second Language"
2. bilingual\* OR "dual language" OR "English language learner" OR "limited English proficient" OR "culturally and linguistically diverse" OR "second language"
3. **1 OR 2**
4. DE "Language Delay" OR MM "Language Development" OR MM "Language Disorders" OR DE "Conversation" OR DE "Storytelling" OR DE "Oral Communication" OR DE "Sentences" OR DE "Vocabulary" OR DE "Grammar" OR DE "Verbal Communication"
5. language N1 (disorder\* OR delay\* OR impairment\* OR problem\* OR difficult\* OR challeng\* OR difference) OR expressive N2 (disorder\* OR delay\* OR impairment\* OR problem\* OR difficult\* OR challeng\*) OR receptive N2 (disorder\* OR delay\* OR impairment\* OR problem\* OR difficult\* OR challeng\* OR difference)
6. gramma\* OR vocab\* OR semantic\* OR "word-order" OR "word order" OR morpholog\* OR "word meaning" OR syntax OR lexicon OR "sentence structure" OR narrat\* OR "story-telling" OR "story telling" OR "story structure" OR microstructure OR macrostructure OR "code-mixing" OR "code mixing" OR "code-meshing" OR "code meshing" OR "code-switching" OR "code switching" OR translanguag\*
7. **4 OR 5 OR 6**
8. MM "Preschool Students" OR MM "Nursery School Students"
9. preschool\* OR pre-school\* OR toddler\* OR child\*
10. **8 OR 9**
11. MM "Measurement"
12. assess\* OR measure\* OR test\* OR evaluat\* OR characteriz\* OR distinguish\* OR differentiat\* OR discriminat\*
13. **11 OR 12**
14. **3 AND 7 AND 10 AND 13**

### ACADEMIC SEARCH COMPLETE FINAL SEARCH STRATEGY: MARCH 10, 2018

#### Limits (2008–2018; English language; peer-reviewed; academic journal)

1. DE "MULTILINGUALISM" OR DE "BILINGUALISM"
2. bilingual\* OR dual languag\* OR "English language learn" OR "limited English proficient" OR "culturally and linguistically diverse" OR "second language"
3. **1 OR 2**
4. DE "INTERLANGUAGE (Language learning)" OR DE "SECOND language acquisition" OR DE "LANGUAGE disorders" OR DE "EXPRESSIVE language disorder" OR DE "LANGUAGE delay"
5. language N1 (disorder\* OR delay\* OR impairment\* OR problem\* OR difficult\* OR challeng\* OR difference) OR expressive N2 (disorder\* OR delay\* OR impairment\* OR problem\* OR difficult\* OR challeng\* OR difference) OR receptive N2 (disorder\* OR delay\* OR impairment\* OR problem\* OR difficult\* OR challeng\* OR difference) OR "code-mix" OR "code mix" OR "code-mesh" OR "code-mesh" OR "code-switch" OR "code switch" OR translanguag\*

6. express\* OR recept\* OR grammar\* OR vocab\* OR semantic\* OR word-order OR word order OR morpholog\* OR “word meaning” OR syntax OR lexicon OR “sentence structure” OR narrat\* OR “story-telling” OR “story telling” OR “story structure” OR microstructure OR macrostructure
7. **4 OR 5 OR 6**
8. DE "PRESCHOOL children" OR DE "TODDLERS"
9. preschool\* OR pre-school\* OR toddler\* OR child\*
10. **8 OR 9**
11. DE “LANGUAGE testing of children”
12. assess\* OR measure\* OR test\* OR evaluat\* OR characteriz\* OR distinguish\* OR differentiat\* OR discriminat\*
13. **11 OR 12**
14. **3 AND 7 AND 10 AND 13**

## **EMBASE FINAL SEARCH STRATEGY: MARCH 24, 2018**

### **Limits (2008–2018; English; article)**

1. 'multilingualism'/exp OR 'multilingualism' OR 'bilingualism'/mj/exp OR 'bilingualism'
2. 'dual language' OR 'english language learner' OR 'limited english proficient' OR 'culturally and linguistically diverse' OR 'second language'
3. **1 OR 2**
4. 'language development'/mj OR 'language disability'/mj OR 'communication disorder'/mj OR 'language delay'/mj
5. (language NEXT/1 disorder\*) OR (language NEXT/1 delay\*) OR (language NEXT/1 impairment\*) OR (language NEXT/1 problem\*) OR (language NEXT/1 difficult\*) OR (language NEXT/1 challenge)
6. difference:ab,ti OR code?mix:ab,ti OR code?mesh:ab,ti OR translanguag\*:ab,ti OR code?swtich.ab,ti
7. (expressive NEXT/2 disorder) OR (expressive NEXT/2 delay) OR (expressive NEXT/2 impairment) OR (expressive NEXT/2 problem) OR (expressive NEXT/2 difficult) OR (expressive NEXT/2 challenge)
8. (receptive NEXT/2 disorder) OR (receptive NEXT/2 delay) OR (receptive NEXT/2 impairment) OR (receptive NEXT/2 problem) OR (receptive NEXT/2 difficult) OR (receptive NEXT/2 challenge)
9. express\*:ab,ti OR recept\*:ab,ti OR grammar\*:ab,ti OR vocab\*:ab,ti OR semantic\*:ab,ti OR 'word?order':ab,ti OR morpholog\*:ab,ti OR 'word meaning':ab,ti OR syntax:ab,ti OR lexicon:ab,ti OR 'sentence structure':ab,ti OR narrat\*:ab,ti OR 'story-telling':ab,ti OR 'story?telling':ab,ti OR 'story?structure':ab,ti OR microstructure:ab,ti OR macrostructure:ab,ti
10. **4 OR 5 OR 6 OR 7 OR 8 OR 9**
11. 'preschool child'/exp/mj
12. preschool\* OR pre-school\* OR toddler\* OR child\*
13. **11 OR 12**
14. 'evaluation study'/exp/mj
15. assess\*:ab,ti OR measure\*:ab,ti OR test\*:ab,ti OR evaluat\*:ab,ti OR characteriz\*:ab,ti OR distinguish\*:ab,ti OR differentiat\*:ab,ti OR discriminat\*:ab,ti
16. **3 AND 10 AND 13 AND 16**

## **SCOPUS FINAL SEARCH STRATEGY: MARCH 24, 2018**

### **Limits (2008–2018; English; journal; article)**

1. TITLE-ABS-KEY (English learner OR bilingual\* OR dual languag\* OR English language learn\* OR limited English proficien\* OR “culturally and linguistically diverse” OR second language\*)
2. TITLE-ABS-KEY (“language development” OR “language disorder\*” OR “communicat\* disorder”)
3. TITLE-ABS-KEY (language W/1 disorder\* OR delay\* OR impairment\* OR problem\* OR difficult\* OR challeng\* OR difference)
4. TITLE-ABS-KEY (expressive W/2 disorder\* OR delay\* OR impairment\* OR problem\* OR difficult\* or challeng\*)
5. TITLE-ABS-KEY (receptive W/2 disorder\* OR delay\* OR impairment\* OR problem\* OR difficult\* or challeng\*)
6. TITLE-ABS-KEY (code-mix\* OR code mix OR code mesh OR code-mesh\* OR translanguag\*)
7. TITLE-ABS-KEY (language\* OR express\* OR recept\* OR gramma\* OR vocab\* OR semantic\* OR “word-order” OR “word order” OR morpholog\* “OR word meaning” OR syntax OR lexicon OR “sentence structure” OR narrat\* OR “story-telling” OR “story telling” OR “story structure” OR microstructure OR macrostructure)
8. **2 OR 3 OR 4 OR 5 OR 6 OR 7**
9. TITLE-ABS-KEY (preschool\* OR pre-school\* OR toddler\* OR child\*)
10. TITLE-ABS-KEY (“language assess\*” OR “assessment tool\*” OR assess\* OR measure\* OR test\* OR evaluat\* OR characteriz\* OR distinguish\* OR differentiat\* OR discriminat\*)
11. **1 AND 8 AND 9 AND 10**
