# Supplementary material
Source: publisher figshare collection journal article supplement (https://asha.figshare.com/articles/dataset/_/8637206)
Supplement: Supplementary file 2 [file 1]

## Supplemental Material S2. Final reference list of included citations.

1. Aarts, R., Demir-Vegter, S., Kurvers, J., & Henrichs, L. (2016). Academic language in shared book reading: Parent and teacher input to mono- and bilingual preschoolers. *Language Learning*, 66(2), 263–295.
2. Abbot-Smith, K., Morawska-Patera, P., Łuniewska, M., Spruce, M., & Haman, E. (2018). Using parental questionnaires to investigate the heritage language proficiency of bilingual children. *Child Language Teaching and Therapy*, 34(2) 155–170.
3. Akoğlu, G., & Yağmur, K. (2016). First-language skills of bilingual Turkish immigrant children growing up in a Dutch submersion context. *International Journal of Bilingual Education and Bilingualism*, 19(6), 706–721.
4. Alt, M., Arizmendi, G. D., & DiLallo, J. N. (2016). The role of socioeconomic status in the narrative story retells of school-aged English language learners. *Language, Speech, and Hearing Services in Schools*, 47(4), 313–323.
5. Alt, M., Meyers, C., & Figueroa, C. (2013). Factors that influence fast mapping in children exposed to Spanish and English. *Journal of Speech, Language, and Hearing Research*, 56(4), 1237–1248.
6. Altman, C., Armon-Lotem, S., Fichman, S., & Walters, J. (2016). Macrostructure, microstructure, and mental state terms in the narratives of English–Hebrew bilingual preschool children with and without specific language impairment. *Applied Psycholinguistics*, 37(1), 165–193.
7. Anaya, J. B., Peña, E. D., & Bedore, L. M. (2018). Conceptual scoring and classification accuracy of vocabulary testing in bilingual children. *Language, Speech, and Hearing Services in Schools*, 49(1), 85–97.
8. Anthony, J. L., Solari, E. J., Williams, J. M., Schoger, K. D., Zhang, Z., Branum-Martin, L., & Francis, D. J. (2009). Development of bilingual phonological awareness in Spanish speaking English language learners: The roles of vocabulary, letter knowledge, and prior phonological awareness. *Scientific Studies of Reading*, 13(6), 535–564.
9. Armon-Lotem, S. (2014). Between L2 and SLI: Inflections and prepositions in the Hebrew of bilingual children with TLD and monolingual children with SLI. *Journal of Child Language*, 41(1), 3–33.
10. Armon-Lotem, S., & Ohana, O. (2017). A CDI study of bilingual English-Hebrew children frequency of exposure as a major source of variation. *International Journal of Bilingual Education and Bilingualism*, 20(2), 201–217.
11. Au-Yeung, K., Hipfner-Boucher, K., Chen, X., Pasquarella, A., D'Angelo, N., & Hélène Deacon, S. (2015). Development of English and French language and literacy skills in EL1 and EL French immersion students in the early grades. *Reading Research Quarterly*, 50(2), 233–254.
12. Auleear Owodally, A. M. (2015). Supporting early oral language skills for preschool ELL in an EFL context, Mauritius: Possibilities and challenges. *Early Child Development and Care*, 185(2), 226–243.
13. Axelrod, Y. (2017). "Ganchulinas" and "rainbowli" colors: Young multilingual children play with language in Head Start classroom. *Early Childhood Education Journal*, 45(1), 103–110.
14. Bar-Shalom, E. G., & Zaretsky, E. (2008). Selective attrition in Russian-English bilingual children: Preservation of grammatical aspect. *International Journal of Bilingualism*, 12(4), 281–302.
15. Barnes, J., & Garcia, I. (2013). Vocabulary growth and composition in monolingual and bilingual Basque infants and toddlers. *International Journal of Bilingualism*, 17(3), 357–374.
16. Baron, A., Bedore, L. M., Peña, E. D., Lovgren-Urbe, S. D., López, A. A., & Villagran, E. (2018). Production of Spanish grammatical forms in U.S. bilingual children. *American Journal of Speech-Language Pathology*, 27, 975–987.
17. Barragan, B., Castilla-Earls, A., Martinez-Nieto, L., Restrepo, M. A., & Gray, S. (2018). Performance of low-income Dual Language Learners attending English-only schools on the Clinical Evaluation of Language Fundamentals–Fourth Edition, Spanish. *Language, Speech, and Hearing Services in Schools*, 49(2), 292–305.
18. Becker, B., Klein, O., & Biedinger, N. (2013). The development of cognitive, language, and cultural skills from age 3 to 6: A comparison between children of Turkish origin and children of native-born German parents and the role of immigrant parents' acculturation to the receiving society. *American Educational Research Journal*, 50(3), 616–649.
19. Bedore, L. M., Peña, E. D., Joyner, D., & Macken, C. (2011). Parent and teacher rating of bilingual language proficiency and language development concerns. *International Journal of Bilingual Education and Bilingualism*, 14(5), 489–511.

20. Bedore, L. M., Peña, E. D., Summers, C. L., Boerger, K. M., Resendiz, M. D., Greene, K., ... Gillam, R. B. (2012). The measure matters: Language dominance profiles across measures in Spanish–English bilingual children. *Bilingualism: Language and Cognition*, 15(3), 616–629.
21. Bergström, K., Klatte, M., Steinbrink, C., & Lachmann, T. (2016). First and second language acquisition in German children attending a Kindergarten immersion program: A combined longitudinal and cross-sectional study. *Language Learning*, 66(2), 386–418.
22. Bialystok, E., Barac, R., Blaye, A., & Poulin-Dubois, D. (2010). Word mapping and executive functioning in young monolingual and bilingual children. *Journal of Cognition and Development*, 11(4), 485–508.
23. Bialystok, E., Luk, G., Peets, K. F., & Yang, S. (2010). Receptive vocabulary differences in monolingual and bilingual children. *Bilingualism: Language and Cognition*, 13(4), 525–531.
24. Bitetti, D., & Hammer, C. S. (2016). The home literacy environment and the English narrative development of Spanish–English bilingual children. *Journal of Speech, Language, and Hearing Research*, 59(5), 1159–1171.
25. Blom, E., & Baayen, H. R. (2013). The impact of verb form, sentence position, home language, and second language proficiency on subject–verb agreement in child second language Dutch. *Applied Psycholinguistics*, 34(4), 777–811.
26. Blom, E., & Bosma, E. (2016). The sooner the better? An investigation into the role of age of onset and its relation with transfer and exposure in bilingual Frisian–Dutch children. *Journal of Child Language*, 43(3), 581–607.
27. Blom, E., Küntay, A. C., Messer, M., Verhagen, J., & Leseman, P. (2014). The benefits of being bilingual: Working memory in bilingual Turkish–Dutch children. *Journal of Experimental Child Psychology*, 128, 105–119.
28. Blom, E., & Paradis, J. (2013). Past tense production by English second language learners with and without language impairment. *Journal of Speech, Language, and Hearing Research*, 56(1), 281–294.
29. Blom, E., Paradis, J., & Duncan, T. S. (2012). Effects of input properties, vocabulary size, and L1 on the development of third person singular–s in child L2 English. *Language Learning*, 62(3), 965–994.
30. Boerma, T., Chiat, S., Leseman, P., Timmermeister, M., Wijnen, F., & Blom, E. (2015). A quasi universal nonword repetition task as a diagnostic tool for bilingual children learning Dutch as a second language. *Journal of Speech, Language, and Hearing Research*, 58(6), 1747–1760.
31. Boerma, T., Leseman, P., Wijnen, F., & Blom, E. (2017). Language proficiency and sustained attention in monolingual and bilingual children with and without language impairment. *Frontiers in Psychology*, 8, 1–16.
32. Boerma, T., Wijnen, F., Leseman, P., & Blom, E. (2017). Grammatical morphology in monolingual and bilingual children with and without language impairment: The case of Dutch plurals and past participles. *Journal of Speech, Language, and Hearing Research*, 60(7), 2064–2080.
33. Bohlmann, N. L., Maier, M. F., & Palacios, N. (2015). Bidirectionality in self-regulation and expressive vocabulary: Comparisons between monolingual and dual language learners in preschool. *Child Development*, 86(4), 1094–1111.
34. Bohman, T. M., Bedore, L. M., Peña, E. D., Méndez-Perez, A., & Gillam, R. B. (2010). What you hear and what you say: Language performance in Spanish–English bilinguals. *International Journal of Bilingual Education and Bilingualism*, 13(3), 325–344.
35. Bohnacker, U. (2016). Tell me a story in English or Swedish: Narrative production and comprehension in bilingual preschoolers and first graders. *Applied Psycholinguistics*, 37(1), 19–48.
36. Bonifacci, P., Barbieri, M., Tomassini, M., & Roch, M. (2018). In few words: linguistic gap but adequate narrative structure in preschool bilingual children. *Journal of Child Language*, 45(1), 120–147.
37. Bonifacci, P., Tobia, V., Bernabini, L., & Marzocchi, G. M. (2016). Early literacy and numeracy skills in bilingual minority children: Toward a relative independence of linguistic and numerical processing. *Frontiers in Psychology*, 7, 1–14.
38. Boyce, L. K., Gillam, S. L., Innocenti, M. S., Cook, G. A., & Ortiz, E. (2013). An examination of language input and vocabulary development of young Latino dual language learners living in poverty. *First Language*, 33(6), 572–593.
39. Boyer, V. E., & Martin, K. Y. (2012). Invented rule with English language learners. *Clinical Linguistics & Phonetics*, 26(7), 613–627.

40. Brandeker, M., & Thordardottir, E. (2015). Language exposure in bilingual toddlers: Performance on nonword repetition and lexical tasks. *American Journal of Speech Language Pathology*, 24(2), 126–138.
41. Branum-Martin, L., Mehta, P. D., Carlson, C. D., Francis, D. J., & Goldenberg, C. (2014). The nature of Spanish versus English language use at home. *Journal of Educational Psychology*, 106(1), 181–199.
42. Brebner, C., Chandler Yeo, H., Goh, M. M., Kam, K. W., & Yeo, W. S. F. (2015). Tests over time: Evaluating the currency of normative data in a complex multilingual environment. *International Journal of Speech-Language Pathology*, 17(6), 556–564.
43. Brebner, C., McCormack, P., & Rickard Liow, S. (2016). Marking of verb tense in the English of preschool English–Mandarin bilingual children: Evidence from language development profiles within subgroups on the Singapore English Action Picture Test. *International Journal of Language and Communication Disorders*, 51(1), 31–43.
44. Bridges, K., & Hoff, E. (2014). Older sibling influences on the language environment and language development of toddlers in bilingual homes. *Applied Psycholinguistics*, 35(2), 225–241.
45. Bunta, F., & Douglas, M. (2013). The effects of dual-language support on the language skills of bilingual children with hearing loss who use listening devices relative to their monolingual peers. *Language, Speech, and Hearing Services in Schools*, 44(3), 281–290.
46. Burgoyne, K., Duff, F. J., Nielsen, D., Ulicheva, A., & Snowling, M. J. (2016). Bilingualism and biliteracy in Down Syndrome: Insights from a case study. *Language Learning*, 66(4), 945–971.
47. Byers-Heinlein, K. (2013). Parental language mixing: Its measurement and the relation of mixed input to young bilingual children's vocabulary size. *Bilingualism: Language and Cognition*, 16(1), 32–48.
48. Caesar, L. G., & Nelson, N. W. (2014). Parental involvement in language and literacy acquisition: A bilingual journaling approach. *Child Language Teaching and Therapy*, 30(3), 317–336.
49. Castilla, A. P., Restrepo, M. A., & Perez-Leroux, A. T. (2009). Individual differences and language interdependence: A study of sequential bilingual development in Spanish-English preschool children. *International Journal of Bilingual Education and Bilingualism*, 12(5), 565–580.
50. Cha, K., & Goldenberg, C. (2015). The complex relationship between bilingual home language input and kindergarten children's Spanish and English oral proficiencies. *Journal of Educational Psychology*, 107(4), 935.
51. Chen, L., & Yan, R. (2011). Development and use of English evaluative expressions in narratives of Chinese–English bilinguals. *Bilingualism: Language and Cognition*, 14(4), 570–578.
52. Cheung, H. S., & Elliott, J. M. (2017). Child shyness and peer likeability: The moderating role of pragmatics and vocabulary. *British Journal of Developmental Psychology*, 35(4), 531–545.
53. Cheung, H., Chung, K. K. H., Wong, S. W. L., McBride-Chang, C., Penney, T. B., & Ho, C. S. H. (2010). Speech perception, metalinguistic awareness, reading, and vocabulary in Chinese–English bilingual children. *Journal of Educational Psychology*, 102(2), 367–380.
54. Chevalier, S. (2012). Active trilingualism in early childhood: The motivating role of caregivers in interaction. *International Journal of Multilingualism*, 9(4), 437–454.
55. Chlapana, E., & Tafa, E. (2014). Effective practices to enhance immigrant kindergarteners' second language vocabulary learning through storybook reading. *Reading and Writing*, 27(9), 1619–1640.
56. Chow, B. W. Y., McBride-Chang, C., & Cheung, H. (2010). Parent–child reading in English as a second language: Effects on language and literacy development of Chinese kindergarteners. *Journal of Research in Reading*, 33(3), 284–301.
57. Clahsen, H., Rothweiler, M., Sterner, F., & Chilla, S. (2014). Linguistic markers of specific language impairment in bilingual children: The case of verb morphology. *Clinical Linguistics and Phonetics*, 28(9), 709–721.
58. Cleave, P. L., Bird, E. K. R., Trudeau, N., & Sutton, A. (2014). Syntactic bootstrapping in children with Down syndrome: The impact of bilingualism. *Journal of Communication Disorders*, 49, 42–54.
59. Cleave, P. L., Girolametto, L. E., Chen, X., & Johnson, C. J. (2010). Narrative abilities in monolingual and dual language learning children with specific language impairment. *Journal of Communication Disorders*, 43(6), 511–522.
60. Collins, M. F. (2010). ELL preschoolers' English vocabulary acquisition from storybook reading. *Early Childhood Research Quarterly*, 25(1), 84–97.

61. Collins, M. F. (2016). Supporting inferential thinking in preschoolers: Effects of discussion on children's story comprehension. *Early Education and Development*, 27(7), 932–956.
62. Combitis, P. N., Barlow, J. A., Potapova, I., & Pruitt-Lord, S. (2017). Influences of phonological context on tense marking in Spanish–English dual language learners. *Journal of Speech, Language, and Hearing Research*, 60(8), 2199–2216.
63. Core, C., Hoff, E., Rumiche, R., & Señor, M. (2013). Total and conceptual vocabulary in Spanish English bilinguals from 22 to 30 months: Implications for assessment. *Journal of Speech, Language, and Hearing Research*, 56(5), 1637–1649.
64. Coyle, Y., & Gómez Gracia, R. (2014). Using songs to enhance L2 vocabulary acquisition in preschool children. *ELT Journal*, 68(3), 276–285.
65. Cycyk, L. M., Bitetti, D., & Hammer, C. S. (2015). Maternal depressive symptomatology, social support, and language development of bilingual preschoolers from low-income households. *American Journal of Speech-Language Pathology*, 24(3), 411–425.
66. David, A., & Wei, L. (2008). Individual differences in the lexical development of French-English bilingual children. *International Journal of Bilingual Education and Bilingualism*, 11(5), 598–618.
67. Davidson, D., Raschke, V. R., & Pervez, J. (2010). Syntactic awareness in young monolingual and bilingual (Urdu–English) children. *Cognitive Development*, 25(2), 166–182.
68. Davison, M. D., & Hammer, C. S. (2012). Development of 14 English grammatical morphemes in Spanish–English preschoolers. *Clinical Linguistics and Phonetics*, 26(8), 728–742.
69. Davison, M. D., Hammer, C., & Lawrence, F. R. (2011). Associations between preschool language and first grade reading outcomes in bilingual children. *Journal of Communication Disorders*, 44(4), 444–458.
70. Dijkstra, J., Kuiken, F., Jorna, R. J., & Klinkenberg, E. L. (2016). The role of majority and minority language input in the early development of a bilingual vocabulary. *Bilingualism: Language and Cognition*, 19(1), 191–205.
71. Dockrell, J. E., Stuart, M., & King, D. (2010). Supporting early oral language skills for English language learners in inner city preschool provision. *British Journal of Educational Psychology*, 80(4), 497–515.
72. Downer, J. T., López, M. L., Grimm, K. J., Hamagami, A., Pianta, R. C., & Howes, C. (2012). Observations of teacher–child interactions in classrooms serving Latinos and dual language learners: Applicability of the Classroom Assessment Scoring System in diverse settings. *Early Childhood Research Quarterly*, 27(1), 21–32.
73. Dubasik, V. L., & Svetina, D. (2014). Examining similarities and differences among parent teacher reports of Spanish–English productive vocabulary. *Language, Speech, and Hearing Services in Schools*, 45(4), 325–336.
74. Dubasik, V. L., & Wilcox, M. J. (2013). Spanish and early English development in young dual language learners: A preliminary study. *Speech, Language and Hearing*, 16(3), 163–175.
75. Durán, L. K., Roseth, C. J., & Hoffman, P. (2010). An experimental study comparing English-only and transitional bilingual education on Spanish-speaking preschoolers' early literacy development. *Early Childhood Research Quarterly*, 25(2), 207–217.
76. Durán, L., Roseth, C. J., & Hoffman, P. (2015). Effects of transitional bilingual education on Spanish-speaking preschoolers' literacy and language development: Year 2 results. *Applied Psycholinguistics*, 36(4), 921–951.
77. Ebert, K. D. (2014). Role of auditory non-verbal working memory in sentence repetition for bilingual children with primary language impairment. *International Journal of Language and Communication Disorders*, 49(5), 631–636.
78. Ebert, K. D., Kohnert, K., Pham, G., Disher, J. R., & Payesteh, B. (2014). Three treatments for bilingual children with primary language impairment: Examining cross-linguistic and cross-domain effects. *Journal of Speech, Language, and Hearing Research*, 57(1), 172–186.
79. Ebert, K. D., Pham, G., & Kohnert, K. (2014). Lexical profiles of bilingual children with primary language impairment. *Bilingualism: Language and Cognition*, 17(4), 766–783.
80. Erdos, C., Genesee, F., Savage, R., & Haigh, C. (2014). Predicting risk for oral and written language learning difficulties in students educated in a second language. *Applied Psycholinguistics*, 35(2), 371–398.
81. Estrem, T. L. (2011). Expressive vocabulary development of immigrant preschoolers who speak Somali, Spanish, and Hmong. *TESL-EJ*, 15(1), 1–19.



82. Eviatar, Z., Taha, H., Cohen, V., & Schwartz, M. (2018). Word learning by young sequential bilinguals: Fast mapping in Arabic and Hebrew. *Applied Psycholinguistics*, 39(3), 649–674.
83. Farrington, A. L., Lonigan, C. J., Phillips, B. M., Farver, J. M., & McDowell, K. D. (2015). Evaluation of the utility of the revised Get Ready to Read! for Spanish-speaking English language learners through differential item functioning analysis. *Assessment for Effective Intervention*, 40(4), 216–227.
84. Farver, J. A. M., Lonigan, C. J., & Eppe, S. (2009). Effective early literacy skill development for young Spanish-speaking English language learners: An experimental study of two methods. *Child Development*, 80(3), 703–719.
85. Farver, J. A. M., Xu, Y., Lonigan, C. J., & Eppe, S. (2013). The home literacy environment and Latino head start children's emergent literacy skills. *Developmental Psychology*, 49(4), 775–791.
86. Fedda, O. D., & Oweini, A. (2012). The effect of diglossia on Arabic vocabulary development in Lebanese students. *Educational Research and Reviews*, 7(16), 351–361.
87. Feltmate, K., & Bird, E. K. R. (2008). Language learning in four bilingual children with Down Syndrome: A detailed analysis of vocabulary and morphosyntax. *Canadian Journal of Speech-Language Pathology and Audiology*, 32(1), 6–20.
88. Fleckstein, A., Prévost, P., Tuller, L., Sizaret, E., & Zebib, R. (2018). How to identify SLI in bilingual children: a study on sentence repetition in French. *Language Acquisition*, 25(1), 85–101.
89. Foursha-Stevenson, C., & Nicoladis, E. (2011). Early emergence of syntactic awareness and cross-linguistic influence in bilingual children's judgments. *International Journal of Bilingualism*, 15(4), 521–534.
90. Gagarina, N. (2009). Verbs of motion in Russian: An acquisitional perspective. *The Slavic and East European Journal*, 451–470.
91. Gagarina, N. (2016). Narratives of Russian–German preschool and primary school bilinguals: Rasskaz and Erzählung. *Applied Psycholinguistics*, 37(1), 91–122.
92. Galeano, R. (2011). Scaffolding productive language skills through sociodramatic play. *American Journal of Play*, 3(3), 324–355.
93. Gámez, P. B. (2015). Classroom-based English exposure and English language learners' expressive language skills. *Early Childhood Research Quarterly*, 31, 135–146.
94. Gámez, P. B., & Vasilyeva, M. (2015). Increasing second language learners' production and comprehension of developmentally advanced syntactic forms. *Language Learning and Development*, 11(2), 128–151.
95. Garcia, E. B. (2018). The classroom language context and English and Spanish vocabulary development among dual language learners attending Head Start. *Early Childhood Research Quarterly*, 42, 148–157.
96. Gasteiger-Klicpera, B., Knapp, W., Kucharz, D., Schabmann, A., & Schmidt, B. (2009). Effects of language learning interventions in pre-school children: A longitudinal study. *Forum on Public Policy Online*, 1, 1–13.
97. Gathercole, V. C. M., Kennedy, I., & Thomas, E. M. (2016). Socioeconomic level and bilinguals' performance on language and cognitive measures. *Bilingualism: Language and Cognition*, 19(5), 1057–1078.
98. Gatt, D., Attard, D., Łuniewska, M., & Haman, E. (2017). The effects of bilingual status on lexical comprehension and production in Maltese five-year-old children: A LITMUS-CLT study. *Clinical Linguistics and Phonetics*, 31(11–12), 844–873.
99. Gauthier, K., Genesee, F., & Kasparian, K. (2012). Acquisition of complement clitics and tense morphology in internationally adopted children acquiring French. *Bilingualism: Language and Cognition*, 15(2), 304–319.
100. Gibson, T. A., Summers, C., Pena, E. D., Bedore, L. M., Gillam, R. B., & Bohman, T. M. (2015). The role of phonological structure and experience in bilingual children's nonword repetition performance. *Bilingualism: Language and Cognition*, 18(3), 551–560.
101. Glennen, S. (2015). Internationally adopted children in the early school years: Relative strengths and weaknesses in language abilities. *Language, Speech, and Hearing Services in Schools*, 46(1), 1–13.
102. Golberg, H., Paradis, J., & Crago, M. (2008). Lexical acquisition over time in minority first language children learning English as a second language. *Applied Psycholinguistics*, 29(1), 41–65.
103. Goldfeld, S., O'Connor, M., Mithen, J., Sayers, M., & Brinkman, S. (2014). Early development of emerging and English-proficient bilingual children at school entry in an Australian population cohort. *International Journal of Behavioral Development*, 38(1), 42–51.

104. Gonzalez, J., Pollard-Durodola, S., Saenz, L., Soares, D., Davis, H., Resendez, N., & Zhu, L. (2016). Spanish and English early literacy profiles of preschool Latino English language learner children. *Early Education and Development*, 27(4), 513–531.
105. Goodrich, J. M., & Lonigan, C. J. (2018). Development of first-and second-language vocabulary knowledge among language-minority children: Evidence from single language and conceptual scores. *Journal of Child Language*, 1–12.
106. Goodrich, J. M., Lonigan, C. J., & Farver, J. M. (2013). Do early literacy skills in children's first language promote development of skills in their second language? An experimental evaluation of transfer. *Journal of Educational Psychology*, 105(2), 414–426.
107. Goodrich, J. M., Lonigan, C. J., & Farver, J. M. (2014). Children's expressive language skills and their impact on the relation between first-and second-language phonological awareness skills. *Scientific Studies of Reading*, 18(2), 114–129.
108. Goodrich, J. M., Lonigan, C. J., Kleuver, C. G., & Farver, J. M. (2016). Development and transfer of vocabulary knowledge in Spanish-speaking language minority preschool children. *Journal of Child Language*, 43(5), 969–992.
109. Gorman, B. K., Bingham, G. E., Fiestas, C. E., & Terry, N. P. (2016). Assessing the narrative abilities of Spanish-speaking preschool children: A Spanish adaptation of the narrative assessment protocol. *Early Childhood Research Quarterly*, 36, 307–317.
110. Granena, G. (2013). Individual differences in sequence learning ability and second language acquisition in early childhood and adulthood. *Language Learning*, 63(4), 665–703.
111. Granena, G. (2014). Language aptitude and long-term achievement in early childhood L2 learners. *Applied Linguistics*, 35(4), 483–503.
112. Grasso, S. M., Peña, E. D., Bedore, L. M., Hixon, J. G., & Griffin, Z. M. (2018). Cross-linguistic cognate production in Spanish–English bilingual children with and without specific language impairment. *Journal of Speech, Language, and Hearing Research*, 61(3), 619–633.
113. Gray, S., O'Connell, A. A., Pentimonti, J., Restrepo, M. A., Justice, L. M., Lomax, R., ... Nelson, R. R. (2015). The dimensionality of Spanish in young Spanish–English dual-language learners. *Journal of Speech, Language, and Hearing Research*, 58(3), 754–766.
114. Greene, K., Bedore, L., & Peña, L. (2014). Bilingual children's use of lexical strategies under narrative monologue and dialogue conditions. *Language and Sociocultural Theory*, 1(2), 101–124.
115. Greene, K. J., Peña, E. D., & Bedore, L. M. (2013). Lexical choice and language selection in bilingual preschoolers. *Child Language Teaching and Therapy*, 29(1), 27–39.
116. Greenfield, R. (2011). Beginning again: The impact of international adoption on the English language development of a preschooler. *Journal of Early Childhood Literacy*, 11(1), 47–72.
117. Griva, E., & Sivropoulou, R. (2009). Implementation and evaluation of an early foreign language learning project in kindergarten. *Early Childhood Education Journal*, 37(1), 79–87.
118. Gross, M., Buac, M., & Kaushanskaya, M. (2014). Conceptual scoring of receptive and expressive vocabulary measures in simultaneous and sequential bilingual children. *American Journal of Speech-Language Pathology*, 23(4), 574–586.
119. Gross, M., & Kaushanskaya, M. (2015). Voluntary language switching in English–Spanish bilingual children. *Journal of Cognitive Psychology*, 27(8), 992–1013.
120. Grüter, T., & Crago, M. (2012). Object clitics and their omission in child L2 French: The contributions of processing limitations and L1 transfer. *Bilingualism: Language and Cognition*, 15(3), 531–549.
121. Guiberson, M. (2014). Bilingual skills of deaf/hard of hearing children from Spain. *Cochlear Implants International*, 15(2), 87–92.
122. Guiberson, M., & Rodríguez, B. L. (2010). Measurement properties and classification accuracy of two Spanish parent surveys of language development for preschool-age children. *American Journal of Speech-Language Pathology*, 19(3), 225–237.
123. Guiberson, M., Rodríguez, B. L., & Dale, P. S. (2011). Classification accuracy of brief parent report measures of language development in Spanish-speaking toddlers. *Language, Speech, and Hearing Services in Schools*, 42(4), 536–549.

124. Guiberson, M., Rodríguez, B. L., & Zajacova, A. (2015). Accuracy of Telehealth-Administered Measures to Screen Language in Spanish-Speaking Preschoolers. *Telemedicine and EHealth*, 21(9), 714–720.
125. Gutiérrez-Clellen, V. F., & Simon-Cereijido, G. (2010). Using nonword repetition tasks for the identification of language impairment in Spanish-English-speaking children: Does the language of assessment matter? *Learning Disabilities Research & Practice*, 25(1), 48–58.
126. Gutiérrez-Clellen, V. F., Simon-Cereijido, G., & Wagner, C. (2008). Bilingual children with language impairment: A comparison with monolinguals and second language learners. *Applied Psycholinguistics*, 29(1), 3–19.
127. Gutiérrez-Clellen, V., Simon-Cereijido, G., & Sweet, M. (2012). Predictors of second language acquisition in Latino children with specific language impairment. *American Journal of Speech-Language Pathology*, 21(1), 64–77.
128. Hagan-Burke, S., Soares, D. A., Gonzalez, J. E., Zhu, L., Davis, H. S., Kwok, O. M., ... Resendez, N. M. (2016). Associations between problem behaviors and early vocabulary skills among Hispanic dual-language learners in pre-K. *Topics in Early Childhood Special Education*, 36(2), 91–102.
129. Hambly, C., & Fombonne, E. (2014). Factors influencing bilingual expressive vocabulary size in children with Autism Spectrum Disorders. *Research in Autism Spectrum Disorders*, 8(9), 1079–1089.
130. Hammer, C. S., Davison, M. D., Lawrence, F. R., & Miccio, A. W. (2009). The effect of maternal language on bilingual children's vocabulary and emergent literacy development during Head Start and kindergarten. *Scientific Studies of Reading*, 13(2), 99–121.
131. Hammer, C. S., Komaroff, E., Rodriguez, B. L., Lopez, L. M., Scarpino, S. E., & Goldstein, B. (2012). Predicting Spanish–English bilingual children's language abilities. *Journal of Speech, Language, and Hearing Research*, 55(5), 1251–1264.
132. Han, M., Silva, L., Vukelich, C., Buell, M., & Hou, L. (2014). Development of early English language and literacy skills among Spanish-speaking children: Does preschool make a difference? *Early Child Development and Care*, 184(4), 537–552.
133. Hansen, P., Simonsen, H. G., Luniewska, M., & Haman, E. (2017). Validating the psycholinguistic aspects of LITMUS-CLT: Evidence from Polish and Norwegian. *Clinical Linguistics and Phonetics*, 31(11–12), 910–930.
134. Hemsley, G., Holm, A., & Dodd, B. (2010). Patterns in diversity: Lexical learning in Samoan-English bilingual children. *International Journal of Speech-Language Pathology*, 12(4), 362–374.
135. Hemsley, G., Holm, A., & Dodd, B. (2013). Conceptual distance and word learning: patterns of acquisition in Samoan–English bilingual children. *Journal of Child Language*, 40(4), 799–820.
136. Hindman, A. H., & Wasik, B. A. (2015). Building vocabulary in two languages: An examination of Spanish-speaking dual language learners in Head Start. *Early Childhood Research Quarterly*, 31, 19–33.
137. Hipfner-Boucher, K., Milburn, T., Weitzman, E., Greenberg, J., Pelletier, J., & Girolametto, L. (2015). Narrative abilities in subgroups of English language learners and monolingual peers. *International Journal of Bilingualism*, 19(6), 677–692.
138. Hoff, E., Core, C., Place, S., Rumiche, R., Señor, M., & Parra, M. (2012). Dual language exposure and early bilingual development. *Journal of Child Language*, 39(1), 1–27.
139. Hoff, E., Quinn, J. M., & Giguere, D. (2017). What explains the correlation between growth in vocabulary and grammar? New evidence from latent change score analyses of simultaneous bilingual development. *Developmental Science*, 21(2), 1–16.
140. Hoff, E., & Ribot, K. M. (2017). Language growth in English monolingual and Spanish-English bilingual children from 2.5 to 5 years. *The Journal of Pediatrics*, 190, 241–245.
141. Hoff, E., Rumiche, R., Burridge, A., Ribot, K. M., & Welsh, S. N. (2014). Expressive vocabulary development in children from bilingual and monolingual homes: A longitudinal study from two to four years. *Early Childhood Research Quarterly*, 29(4), 433–444.
142. Hovsepian, A. (2018). Vocabulary growth in Armenian–English bilingual kindergarteners. *First Language*, 38(1), 47–71.
143. Hsu, D. B. (2014). Mandarin-speaking three-year-olds' demonstration of productive knowledge of syntax: evidence from syntactic productivity and structural priming with the SVO-ba alternation. *Journal of Child Language*, 41(5), 1115–1146.

144. Huerta, M. E. S., & Riojas-Cortez, M. (2014). Playful dialogues of a bilingual child in everyday conversations: Foundations of early literacy. *International Multilingual Research Journal*, 8(3), 231–249.
145. Hurtado, N., Grüter, T., Marchman, V. A., & Fernald, A. (2014). Relative language exposure, processing efficiency and vocabulary in Spanish–English bilingual toddlers. *Bilingualism: Language and Cognition*, 17(1), 189–202.
146. Iluz-Cohen, P., & Walters, J. (2012). Telling stories in two languages: Narratives of bilingual preschool children with typical and impaired language. *Bilingualism: Language and Cognition*, 15(1), 58–74.
147. Jackson, C. W., & Callender, M. F. (2014). Environmental considerations: Home and school comparison of Spanish–English speakers' vocalizations. *Topics in Early Childhood Special Education*, 34(3), 165–174.
148. Jackson, C. W., Schatschneider, C., & Leacock, L. (2014). Longitudinal analysis of receptive vocabulary growth in young Spanish English–speaking children from migrant families. *Language, Speech, and Hearing Services in Schools*, 45(1), 40–51.
149. Jia, G., Chen, J., Kim, H., Chan, P. S., & Jeung, C. (2014). Bilingual lexical skills of school-age children with Chinese and Korean heritage languages in the United States. *International Journal of Behavioral Development*, 38(4), 350–358.
150. Jiménez-Castellanos, O., Blanchard, J., Atwill, K., & Jiménez-Silva, M. (2014). Beginning English literacy development and achievement among Spanish-speaking children in Arizona's English-only classrooms: A four-year two-cohort longitudinal study. *International Multilingual Research Journal*, 8(2), 104–123.
151. Jung, Y., Zuniga, S., Howes, C., Jeon, H. J., Parrish, D., Quick, H., ... Hauser, A. (2016). Improving Latino children's early language and literacy development: Key features of early childhood education within family literacy programmes. *Early Child Development and Care*, 186(6), 845–862.
152. Kalia, V., & Reese, E. (2009). Relations between Indian children's home literacy environment and their English oral language and literacy skills. *Scientific Studies of Reading*, 13(2), 122–145.
153. Kan, P. F. (2014). Novel word retention in sequential bilingual children. *Journal of Child Language*, 41(2), 416–438.
154. Kan, P. F., & Kohnert, K. (2012). A growth curve analysis of novel word learning by sequential bilingual preschool children. *Bilingualism: Language and Cognition*, 15(3), 452–469.
155. Kan, P. F., & Sadagopan, N. (2015). Speech practice effects on bilingual children's fast mapping performance. *Seminars in Speech and Language*, 36(2), 109–119.
156. Kang, J. Y. (2013). Decontextualized language production in two languages: An investigation of children's word definition skills in Korean and English. *Applied Psycholinguistics*, 34(2), 211–231.
157. Kapalková, S., Polišenská, K., Marková, L., & Fenton, J. (2016). Narrative abilities in early successive bilingual Slovak–English children: A cross-language comparison. *Applied Psycholinguistics*, 37(1), 145–164.
158. Kapantzoglou, M., Fergadiotis, G., & Restrepo, M. A. (2017). Language sample analysis and elicitation technique effects in bilingual children with and without language impairment. *Journal of Speech, Language, and Hearing Research*, 60(10), 2852–2864.
159. Kapantzoglou, M., Restrepo, M. A., Gray, S., & Thompson, M. S. (2015). Language ability groups in bilingual children: A latent profile analysis. *Journal of Speech, Language, and Hearing Research*, 58(5), 1549–1562.
160. Kapantzoglou, M., Restrepo, M. A., & Thompson, M. S. (2012). Dynamic assessment of word learning skills: Identifying language impairment in bilingual children. *Language, Speech, and Hearing Services in Schools*, 43(1), 81–96.
161. Karabulut, A., & Kesli Dollar, Y. (2016). The effects of presenting different types of vocabulary clusters on very young learners' foreign language learning. *Education 3–13*, 44(3), 255–268.
162. Karlsen, J., Lyster, S. A. H., & Lervåg, A. (2017). Vocabulary development in Norwegian L1 and L2 learners in the kindergarten–school transition. *Journal of Child Language*, 44(2), 402–426.
163. Keller, K., Troesch, L. M., & Grob, A. (2015). A large receptive–expressive gap in bilingual children. *Frontiers in Psychology*, 6, 1–12.
164. Keller, K., Troesch, L. M., Loher, S., & Grob, A. (2016). The relation between effortful control and language competence—A small but mighty difference between first and second language learners. *Frontiers in Psychology*, 7, 1–12.



165. Kelley, M. F., Roe, M., Blanchard, J., & Atwill, K. (2015). The influence of Spanish vocabulary and phonemic awareness on beginning English reading development: A three-year (K-2nd) longitudinal study. *Journal of Research in Childhood Education*, 29(1), 42–59.
166. Kelly, K. L. (2010). Interpreting the "Sounds of Silence" in Dual Language Preschools in Qatar: Teacher's Use of Story Retelling and Language Sampling. *Perspectives on Communication Disorders and Sciences in Culturally and Linguistically Diverse Populations*, 17(1), 11–24.
167. Kidd, E., Chan, A., & Chiu, J. (2015). Cross-linguistic influence in simultaneous Cantonese-English bilingual children's comprehension of relative clauses. *Bilingualism: Language and Cognition*, 18(3), 438–452.
168. Kim, A. Y., Park, A., & Lust, B. (2018). Simultaneous vs. successive bilingualism among preschool-aged children: a study of four-year-old Korean–English bilinguals in the USA. *International Journal of Bilingual Education and Bilingualism*, 21(2), 164–178.
169. Klassert, A., Gagarina, N., & Kauschke, C. (2014). Object and action naming in Russian-and German-speaking monolingual and bilingual children. *Bilingualism: Language and Cognition*, 17(1), 73–88.
170. Korkman, M., Stenroos, M., Mickos, A., Westman, M., Ekholm, P., & Byring, R. (2012). Does simultaneous bilingualism aggravate children's specific language problems? *Acta Paediatrica*, 101(9), 946–952.
171. Kuipers, J. R., & Thierry, G. (2015). Bilingualism and increased attention to speech: Evidence from event-related potentials. *Brain and Language*, 149, 27–32.
172. Kunnari, S., Välimaa, T., & Laukkanen-Nevala, P. (2016). Macrostructure in the narratives of monolingual Finnish and bilingual Finnish–Swedish children. *Applied Psycholinguistics*, 37(1), 123–144.
173. Lam, B. P. W., & Sheng, L. (2016). The development of morphological awareness in young bilinguals: Effects of age and L1 background. *Journal of Speech, Language, and Hearing Research*, 59(4), 732–744.
174. Lamont, J., Girolametto, L., Johnson, C. J., Chen, X., & Cleave, P. L. (2011). Emergent literacy skills of preschoolers with language disorders: Monolingual English versus dual language learners. *Canadian Journal of Speech-Language Pathology & Audiology*, 35(4), 286–298.
175. Laurent, A., Nicoladis, E., & Marentette, P. (2015). The development of storytelling in two languages with words and gestures. *International Journal of Bilingualism*, 19(1), 56–74.
176. Leacox, L., & Jackson, C. W. (2014). Spanish vocabulary-bridging technology-enhanced instruction for young English language learners' word learning. *Journal of Early Childhood Literacy*, 14(2), 175–197.
177. Lee, H. J., Kim, Y. T., & Yim, D. (2013). Non-word repetition performance in Korean-English bilingual children. *International Journal of Speech-Language Pathology*, 15(4), 375–382.
178. Lee, S., & Gorman, B. K. (2009). Production of Korean case particles in a Korean–English bilingual child with specific language impairment: A preliminary study. *Communication Disorders Quarterly*, 30(3), 167–177.
179. Lewis, K., Sandilos, L. E., Hammer, C. S., Sawyer, B. E., & Méndez, L. I. (2016). Relations among the home language and literacy environment and children's language abilities: A study of Head Start dual language learners and their mothers. *Early Education and Development*, 27(4), 478–494.
180. Li, L., & Tan, C. L. (2016). Home literacy environment and its influence on Singaporean children's Chinese oral and written language abilities. *Early Childhood Education Journal*, 44(4), 381–387.
181. Lin, L. C., & Johnson, C. J. (2016). Mandarin-English bilingual vocabulary development in an English-immersion preschool: How does it compare with monolingual development? *International Journal of Bilingualism*, 20(2), 173–189.
182. Lin, Z. (2010). Interactive dynamic assessment with children learning EFL in kindergarten. *Early Childhood Education Journal*, 37(4), 279–287.
183. Lonigan, C. J., Goodrich, J. M., & Farver, J. M. (2017). Identifying differences in early literacy skills across subgroups of language-minority children: A latent profile analysis. *Developmental Psychology*, 54(4), 631–647.
184. Lonigan, C. J., Lerner, M. D., Goodrich, J. M., Farrington, A. L., & Allan, D. M. (2016). Executive function of Spanish-speaking language-minority preschoolers: Structure and relations with early literacy skills and behavioral outcomes. *Journal of Experimental Child Psychology*, 144, 46–65.
185. Lucero, A. (2016). Oral narrative retelling among emergent bilinguals in a dual language immersion program. *International Journal of Bilingual Education and Bilingualism*, 21(2), 248–264.

186. Lugo-Neris, M. J., Peña, E. D., Bedore, L. M., & Gillam, R. B. (2015). Utility of a language screening measure for predicting risk for language impairment in bilinguals. *American Journal of Speech-Language Pathology*, 24(3), 426–437.
187. Lund, E., Werfel, K. L., & Schuele, C. M. (2015). Phonological awareness and vocabulary performance of monolingual and bilingual preschool children with hearing loss. *Child Language Teaching and Therapy*, 31(1), 85–100.
188. Luo, Y. C., Koh, P. W., Deacon, S. H., & Chen, X. (2017). The roles of metalinguistic skills in Chinese–English biliteracy development. *Reading and Writing*, 1–20.
189. Maier, M. F., Bohlmann, N. L., & Palacios, N. A. (2016). Cross-language associations in the development of preschoolers' receptive and expressive vocabulary. *Early Childhood Research Quarterly*, 36, 49–63.
190. Mancilla-Martinez, J., Gámez, P. B., Vagh, S. B., & Lesaux, N. K. (2016). Parent Reports of Young Spanish–English Bilingual Children's Productive Vocabulary: A Development and Validation Study. *Language, Speech, and Hearing Services in Schools*, 47(1), 1–15.
191. Mancilla-Martinez, J., & Lesaux, N. K. (2011). Early home language use and later vocabulary development. *Journal of Educational Psychology*, 103(3), 535.
192. Mancilla-Martinez, J., & Lesaux, N. K. (2011). The gap between Spanish speakers' word reading and word knowledge: A longitudinal study. *Child Development*, 82(5), 1544–1560.
193. Mancilla-Martinez, J., Pan, B. A., & Vagh, S. B. (2011). Assessing the productive vocabulary of Spanish–English bilingual toddlers from low-income families. *Applied Psycholinguistics*, 32(2), 333–357.
194. Mancilla-Martinez, J., & Vagh, S. B. (2013). Growth in toddlers' Spanish, English, and conceptual vocabulary knowledge. *Early Childhood Research Quarterly*, 28(3), 555–567.
195. Marinis, T., & Saddy, D. (2013). Parsing the passive: comparing children with Specific Language Impairment to sequential bilingual children. *Language Acquisition*, 20(2), 155–179.
196. Marshall, C. R., & Hobsbaum, A. (2015). Sign-Supported English: Is it effective at teaching vocabulary to young children with English as an Additional Language? *International Journal of Language and Communication Disorders*, 50(5), 616–628.
197. Matera, C., & Gerber, M. M. (2008). Effects of a literacy curriculum that supports writing development of Spanish-speaking English learners in Head Start. *NHSA DIALOG*, 11(1), 25–43.
198. Maviş, İ., Tunçer, M., & Gagarina, N. (2016). Macrostructure components in narrations of Turkish–German bilingual children. *Applied Psycholinguistics*, 37(1), 69–89.
199. Mayo, A. Y., & Leseman, P. P. (2008). Off to a good start? Vocabulary development and differences in early family and classroom experiences of children from native-Dutch and immigrant families in the Netherlands. *Educational and Child Psychology*, 25(3), 70–83.
200. McLeod, S., & Harrison, L. J. (2009). Epidemiology of speech and language impairment in a nationally representative sample of 4-to 5-year-old children. *Journal of Speech, Language, and Hearing Research*, 52(5), 1213–1229.
201. McLeod, S., Harrison, L. J., Whiteford, C., & Walker, S. (2016). Multilingualism and speech language competence in early childhood: Impact on academic and social-emotional outcomes at school. *Early Childhood Research Quarterly*, 34, 53–66.
202. McNeill, B., & Everatt, J. (2013). Meta-linguistic predictors of word-level literacy skills in monolingual and language minority learners. *Speech, Language and Hearing*, 16(2), 92–98.
203. Meakins, F., & Wigglesworth, G. (2013). How much input is enough? Correlating comprehension and child language input in an endangered language. *Journal of Multilingual and Multicultural Development*, 34(2), 171–188.
204. Meir, N., & Armon-Lotem, S. (2017). Independent and combined effects of socioeconomic status (SES) and bilingualism on children's vocabulary and verbal short-term memory. *Frontiers in Psychology*, 8, 1–12.
205. Méndez, L. I., Crais, E. R., Castro, D. C., & Kainz, K. (2015). A culturally and linguistically responsive vocabulary approach for young Latino dual language learners. *Journal of Speech, Language, and Hearing Research*, 58(1), 93–106.
206. Méndez, L. I., Hammer, C. S., Lopez, L. M., & Blair, C. (in press). (2018). Examining language and early numeracy skills in young Latino dual language learners. *Early Childhood Research Quarterly*.

207. Méndez, L. I., Perry, J., Holt, Y., Bian, H., & Fafulas, S. (2018). Same or different: Narrative retells in bilingual Latino kindergarten children. *Bilingual Research Journal*, 1–17.
208. Morgan, G. P., Restrepo, M. A., & Auza, A. (2013). Comparison of Spanish morphology in monolingual and Spanish–English bilingual children with and without language impairment. *Bilingualism: Language and Cognition*, 16(3), 578–596.
209. Nicholls, R. J., Eadie, P. A., & Reilly, S. (2011). Monolingual versus multilingual acquisition of English morphology: What can we expect at age 3? *International Journal of Language and Communication Disorders*, 46(4), 449–463.
210. Nicoladis, E., & Foursha-Stevenson, C. (2012). Language and culture effects on gender classification of objects. *Journal of Cross-Cultural Psychology*, 43(7), 1095–1109.
211. Nicoladis, E., & Gavrila, A. (2015). Cross-linguistic influence in Welsh–English bilingual children’s adjectival constructions. *Journal of Child Language*, 42(4), 903–916.
212. Nicoladis, E., & Paradis, J. (2012). Acquiring regular and irregular past tense morphemes in English and French: Evidence from bilingual children. *Language Learning*, 62(1), 170–197.
213. Nicoladis, E., Rose, A., & Foursha-Stevenson, C. (2010). Thinking for speaking and cross-linguistic transfer in preschool bilingual children. *International Journal of Bilingual Education and Bilingualism*, 13(3), 345–370.
214. O’Brien, L. M., Paratore, J. R., Leighton, C. M., Cassano, C. M., Krol-Sinclair, B., & Green, J. G. (2014). Examining differential effects of a family literacy program on language and literacy growth of English language learners with varying vocabularies. *Journal of Literacy Research*, 46(3), 383–415.
215. Ooi, C. C. W., & Wong, A. M. Y. (2012). Assessing bilingual Chinese–English young children in Malaysia using language sample measures. *International Journal of Speech-Language Pathology*, 14(6), 499–508.
216. O’Toole, C., Gatt, D., Hickey, T. M., Miękisz, A., Haman, E., Armon-Lotem, S., ... Kern, S. (2016). Parent report of early lexical production in bilingual children: A cross-linguistic CDI comparison. *International Journal of Bilingual Education and Bilingualism*, 20(2), 124–145.
217. O’Toole, C., & Hickey, T. M. (2017). Bilingual language acquisition in a minority context: using the Irish–English communicative development Inventory to track acquisition of an endangered language. *International Journal of Bilingual Education and Bilingualism*, 20(2), 146–162.
218. Owodally, A. M. A. (2014). Receptive English vocabulary in a foreign language context: A case study of preschoolers in Mauritius. *Journal of Early Childhood Literacy*, 14(2), 198–239.
219. Palermo, F., Mikulski, A. M., & Conejo, L. D. (2017). Self-regulation abilities and Spanish speaking preschoolers’ vocabulary and letter-word skills in Spanish and English. *Early Education and Development*, 28(2), 207–223.
220. Palermo, F., Mikulski, A. M., Fabes, R. A., Hanish, L. D., Martin, C. L., & Stargel, L. E. (2014). English exposure in the home and classroom: Predictions to Spanish-speaking preschoolers’ English vocabulary skills. *Applied Psycholinguistics*, 35(6), 1163–1187.
221. Paradis, J., & Blom, E. (2016). Do early successive bilinguals show the English L2 pattern of precocious BE acquisition? *Bilingualism: Language and Cognition*, 19(3), 630–635.
222. Paradis, J., Emmerzael, K., & Duncan, T. S. (2010). Assessment of English language learners: Using parent report on first language development. *Journal of Communication Disorders*, 43(6), 474–497.
223. Paradis, J., & Kirova, A. (2014). English second-language learners in preschool: Profile effects in their English abilities and the role of home language environment. *International Journal of Behavioral Development*, 38(4), 342–349.
224. Paradis, J., Nicoladis, E., Crago, M., & Genesee, F. (2011). Bilingual children’s acquisition of the past tense: A usage-based approach. *Journal of Child Language*, 38(3), 554–578.
225. Paradis, J., Rice, M. L., Crago, M., & Marquis, J. (2008). The acquisition of tense in English: Distinguishing child second language from first language and specific language impairment. *Applied Psycholinguistics*, 29(4), 689–722.
226. Paradis, J., Schneider, P., & Duncan, T. S. (2013). Discriminating children with language impairment among English-language learners from diverse first-language backgrounds. *Journal of Speech, Language, and Hearing Research*, 56(3), 971–981.

227. Pascoe, M., Rossouw, K., Fish, L., Jansen, C., Manley, N., Powell, M., & Rosen, L. (2016). Speech processing and production in two-year-old children acquiring isiXhosa: A tale of two children. *South African Journal of Communication Disorders*, 63(2), 1–15.
228. Patterson, J. L., Rodríguez, B. L., & Dale, P. S. (2013). Response to dynamic language tasks among typically developing Latino preschool children with bilingual experience. *American Journal of Speech-Language Pathology*, 22(1), 103–112.
229. Peçenek, D. (2011). A longitudinal study of two boys' experiences of acquiring Italian as a second language: The influence of age. *International Journal of Bilingualism*, 15(3), 268–290.
230. Peets, K. F., & Bialystok, E. (2015). Academic discourse: Dissociating standardized and conversational measures of language proficiency in bilingual kindergarteners. *Applied Psycholinguistics*, 36(2), 437–461.
231. Peña, E. D., Bedore, L. M., & Kester, E. S. (2015). Discriminant accuracy of a semantics measure with Latino English-speaking, Spanish-speaking, and English–Spanish bilingual children. *Journal of Communication Disorders*, 53, 30–41.
232. Peña, E. D., Bedore, L. M., & Kester, E. S. (2016). Assessment of language impairment in bilingual children using semantic tasks: Two languages classify better than one. *International Journal of Language and Communication Disorders*, 51(2), 192–202.
233. Peña, E. D., Gillam, R. B., & Bedore, L. M. (2014). Dynamic assessment of narrative ability in English accurately identifies language impairment in English language learners. *Journal of Speech, Language, and Hearing Research*, 57(6), 2208–2220.
234. Peña, E. D., Gillam, R. B., Bedore, L. M., & Bohman, T. M. (2011). Risk for poor performance on a language screening measure for bilingual preschoolers and kindergarteners. *American Journal of Speech-Language Pathology*, 20(4), 302–314.
235. Pérez-Leroux, A. T., Cuza, A., & Thomas, D. (2011). Clitic placement in Spanish–English bilingual children. *Bilingualism: Language and Cognition*, 14(2), 221–232.
236. Petchprasert, A. (2014). The influence of parents' backgrounds, beliefs about English learning, and a dialogic reading program on Thai kindergarteners' English lexical development. *English Language Teaching*, 7(3), 50–62.
237. Petersen, J. M., Marinova-Todd, S. H., & Mirenda, P. (2012). Brief report: An exploratory study of lexical skills in bilingual children with Autism Spectrum Disorder. *Journal of Autism and Developmental Disorders*, 42(7), 1499–1503.
238. Pham, G., Kohnert, K., & Mann, D. (2011). Addressing clinician–client mismatch: A preliminary intervention study with a bilingual Vietnamese–English preschooler. *Language, Speech, and Hearing Services in Schools*, 42(4), 408–422.
239. Pirvulescu, M., Pérez-Leroux, A. T., Roberge, Y., Strik, N., & Thomas, D. (2014). Bilingual effects: Exploring object omission in pronominal languages. *Bilingualism: Language and Cognition*, 17(3), 495–510.
240. Place, S., & Hoff, E. (2011). Properties of dual language exposure that influence 2-year-olds' bilingual proficiency. *Child Development*, 82(6), 1834–1849.
241. Place, S., & Hoff, E. (2016). Effects and noneffects of input in bilingual environments on dual language skills in 2 ½-year-olds. *Bilingualism: Language and Cognition*, 19(5), 1023–1041.
242. Pladevall-Ballester, E. (2016). Developmental asynchrony in the acquisition of subject properties in child L2 English and Spanish. *Language Acquisition*, 23(4), 387–406.
243. Pollard-Durodola, S. D., Gonzalez, J. E., Saenz, L., Soares, D., Resendez, N., Kwok, O., ... Zhu, L. (2016). The effects of content-related shared book reading on the language development of preschool dual language learners. *Early Childhood Research Quarterly*, 36, 106–121.
244. Potapova, I., Kelly, S., Combiths, P. N., & Pruitt-Lord, S. L. (2018). Evaluating English morpheme accuracy, diversity, and productivity measures in language samples of developing bilinguals. *Language, Speech, and Hearing Services in Schools*, 49(2), 260–276.
245. Potgieter, A. P. (2016). Lexical and grammatical development in trilingual speakers of isiXhosa, English and Afrikaans. *South African Journal of Communication Disorders*, 63(2), 1–11.
246. Potgieter, A., & Southwood, F. (2016). A comparison of proficiency levels in 4-year-old monolingual and trilingual speakers of Afrikaans, isiXhosa and South African English across SES boundaries, using LITMUS-CLT. *Clinical Linguistics & Phonetics*, 30(2), 87–100.



247. Prevo, M. J., Malda, M., Emmen, R. A., Yeniad, N., & Mesman, J. (2015). A context dependent view on the linguistic interdependence hypothesis: Language use and SES as potential moderators. *Language Learning*, 65(2), 449–469.
248. Pua, E. P. K., Lee, M. L. C., & Liow, S. J. R. (2017). Screening bilingual preschoolers for language difficulties: Utility of teacher and parent reports. *Journal of Speech, Language, and Hearing Research*, 60(4), 950–968.
249. Quiroz, B., & Dixon, L. Q. (2012). Mother–child interactions during shared literacy activities: Education in a fractured bilingual environment. *Journal of Early Childhood Literacy*, 12(2), 139–175.
250. Ren, Y., Rattanasone, N. X., Wyver, S., Hinton, A., & Demuth, K. (2016). Interpretation of errors made by Mandarin-speaking children on the Preschool Language Scales-Screening Test. *Australian Journal of Educational & Developmental Psychology*, 15, 24–34.
251. Resendiz, M., Henrich, R., Domsch, C., & Belasco, E. (2014). Grammaticality of preschoolers in narratives: Considering the influences of bilingualism and daycare participation: A retrospective and exploratory study. *SIG 14 Perspectives on Communication Disorders and Sciences in Culturally and Linguistically Diverse (CLD) Populations*, 21(1), 22–32.
252. Restrepo, M. A., Morgan, G. P., & Thompson, M. S. (2013). The efficacy of a vocabulary intervention for dual-language learners with language impairment. *Journal of Speech, Language, and Hearing Research*, 56(2), 748–765.
253. Rezzonico, S., Chen, X., Cleave, P. L., Greenberg, J., Hipfner-Boucher, K., Johnson, C. J., ... Girolametto, L. (2015). Oral narratives in monolingual and bilingual preschoolers with SLI. *International Journal of Language & Communication Disorders*, 50(6), 830–841.
254. Rezzonico, S., Goldberg, A., Mak, K. K. Y., Yap, S., Milburn, T., Belletti, A., & Girolametto, L. (2016). Narratives in two languages: Storytelling of bilingual Cantonese–English preschoolers. *Journal of Speech, Language, and Hearing Research*, 59(3), 521–532.
255. Rezzonico, S., Goldberg, A., Milburn, T., Belletti, A., & Girolametto, L. (2017). English verb accuracy of bilingual Cantonese–English preschoolers. *Language, Speech, and Hearing Services in Schools*, 48(3), 153–167.
256. Ribot, K. M., & Hoff, E. (2014). “¿Cómo estas?” “I’m good.” *International Journal of Behavioral Development*, 38(4), 333–341.
257. Ribot, K. M., Hoff, E., & Burrige, A. (2018). Language use contributes to expressive language growth: Evidence from bilingual children. *Child Development*, 89(3), 929–940.
258. Roberts, T. A. (2008). Home storybook reading in primary or second language with preschool children: Evidence of equal effectiveness for second-language vocabulary acquisition. *Reading Research Quarterly*, 43(2), 103–130.
259. Roch, M., Florit, E., & Levorato, C. (2016). Narrative competence of Italian–English bilingual children between 5 and 7 years. *Applied Psycholinguistics*, 37(1), 49–67.
260. Rosales, R., Rehfeldt, R. A., & Huffman, N. (2012). Examining the utility of the stimulus pairing observation procedure with preschool children learning a second language. *Journal of Applied Behavior Analysis*, 45(1), 173–177.
261. Rothweiler, M., Chilla, S., & Babur, E. (2010). Specific language impairment in Turkish: Evidence from case morphology in Turkish–German successive bilinguals. *Clinical Linguistics and Phonetics*, 24(7), 540–555.
262. Rowe, L., Jacobson, R., & Saylor, M. M. (2015). Differences in how monolingual and bilingual children learn second labels for familiar objects. *Journal of Child Language*, 42(6), 1219–1236.
263. Rowe, M. L., Silverman, R. D., & Mullan, B. E. (2013). The role of pictures and gestures as nonverbal aids in preschoolers’ word learning in a novel language. *Contemporary Educational Psychology*, 38(2), 109–117.
264. Rydland, V. Y. (2009). “Whow—when I was going to pretend drinking it tasted coke for real!” Second-language learners’ out-of-frame talk in peer pretend play: A developmental study from preschool to first grade. *European Journal of Developmental Psychology*, 6(2), 190–222.
265. Rydland, V., Grøver, V., & Lawrence, J. (2014). The second-language vocabulary trajectories of Turkish immigrant children in Norway from ages five to ten: The role of preschool talk exposure, maternal education, and co-ethnic concentration in the neighborhood. *Journal of Child Language*, 41(2), 352–381.

266. Samson, J. F., & Lesaux, N. K. (2009). Language-minority learners in special education: Rates and predictors of identification for services. *Journal of Learning Disabilities*, 42(2), 148–162.
267. Sandilos, L. E., Lewis, K., Komaroff, E., Hammer, C. S., Scarpino, S. E., Lopez, L., ... Goldstein, B. (2015). Analysis of bilingual children's performance on the English and Spanish versions of the Woodcock-Muñoz Language Survey-R (WMLS-R). *Language Assessment Quarterly*, 12(4), 386–408.
268. Scarpino, S. E., Lawrence, F. R., Davison, M. D., & Hammer, C. S. (2011). Predicting bilingual Spanish–English children's phonological awareness abilities from their preschool English and Spanish oral language. *Journal of Research in Reading*, 34(1), 77–93.
269. Scheele, A. F., Leseman, P. P., & Mayo, A. Y. (2010). The home language environment of monolingual and bilingual children and their language proficiency. *Applied Psycholinguistics*, 31(1), 117–140.
270. Scheffner Hammer, C., Lawrence, F. R., & Miccio, A. W. (2008). Exposure to English before and after entry into Head Start: Bilingual children's receptive language growth in Spanish and English. *International Journal of Bilingual Education and Bilingualism*, 11(1), 30–56.
271. Schick, A. R., & Melzi, G. (2016). Print-related practices in low-income Latino homes and preschoolers' school-readiness outcomes. *Journal of Early Childhood Literacy*, 16(2), 171–198.
272. Schönenberger, M. (2014). The acquisition of determiners in child L2 German. *Folia Linguistica*, 48(1), 169–224.
273. Schwartz, M. (2014). The impact of the first language first model on vocabulary development among preschool bilingual children. *Reading and Writing*, 27(4), 709–732.
274. Schwartz, M., Minkov, M., Dieser, E., Protassova, E., Moin, V., & Polinsky, M. (2015). Acquisition of Russian gender agreement by monolingual and bilingual children. *International Journal of Bilingualism*, 19(6), 726–752.
275. Schwartz, M., Moin, V., & Leikin, M. (2012). Lexical knowledge development in the first and second languages among language-minority children: The role of bilingual versus monolingual preschool education. *International Journal of Bilingual Education and Bilingualism*, 15(5), 549–571.
276. Schwartz, M., & Rovner, H. (2015). The acquisition of definiteness in Hebrew (L2) by bilingual preschool children (Russian-L1): A longitudinal multiple-case study. *International Journal of Bilingualism*, 19(5), 548–571.
277. Schwartz, M., & Shaul, Y. (2013). Narrative development among language-minority children: The role of bilingual versus monolingual preschool education. *Language, Culture and Curriculum*, 26(1), 36–51.
278. Sen, M., & Geetha, Y. V. (2011). Language abilities in bilingual children with Autism (CWA). *Journal of the All India Institute of Speech & Hearing*, 30, 146–159.
279. Silvén, M., & Rubinov, E. (2010). Language and preliteracy skills in bilinguals and monolinguals at preschool age: Effects of exposure to richly inflected speech from birth. *Reading and Writing*, 23(3–4), 385–414.
280. Simon-Cerejido, G., & Gutiérrez-Clellen, V. F. (2009). A cross-linguistic and bilingual evaluation of the interdependence between lexical and grammatical domains. *Applied Psycholinguistics*, 30(2), 315–337.
281. Simon-Cerejido, G., Gutiérrez-Clellen, V. F., & Sweet, M. (2013). Predictors of growth or attrition of the first language in Latino children with specific language impairment. *Applied Psycholinguistics*, 34(6), 1219–1243.
282. Simon-Cerejido, G., & Méndez, L. I. (2018). Using language-specific and bilingual measures to explore lexical-grammatical links in young Latino dual-language learners. *Language, Speech, and Hearing Services in Schools*, 48(3), 537–550.
283. Simpson Baird, A., Palacios, N., & Kibler, A. (2016). The cognate and false cognate knowledge of young emergent bilinguals. *Language Learning*, 66(2), 448–470.
284. Sims, J., & Coley, R. L. (2016). Independent contributions of mothers' and fathers' language and literacy practices: Associations with children's kindergarten skills across linguistically diverse households. *Early Education and Development*, 27(4), 495–512.
285. Sonnenschein, S., Metzger, S. R., Dowling, R., & Baker, L. (2017). The relative importance of English versus Spanish language skills for low-income Latino English language learners' early language and literacy development. *Early Child Development and Care*, 187, 727–743.

286. Spencer, T. D., Petersen, D. B., & Adams, J. L. (2015). Tier 2 language intervention for diverse preschoolers: An early-stage randomized control group study following an analysis of response to intervention. *American Journal of Speech-Language Pathology*, 24(4), 619–636.
287. Spencer, T. D., Petersen, D. B., Slocum, T. A., & Allen, M. M. (2015). Large group narrative intervention in Head Start preschools: Implications for response to intervention. *Journal of Early Childhood Research*, 13(2), 196–217.
288. Spoelman, M., & Bol, G. W. (2012). The use of subject–verb agreement and verb argument structure in monolingual and bilingual children with specific language impairment. *Clinical Linguistics and Phonetics*, 26(4), 357–379.
289. Spycher, P. (2009). Learning academic language through science in two linguistically diverse kindergarten classes. *The Elementary School Journal*, 109(4), 359–379.
290. Summers, C., Bohman, T. M., Gillam, R. B., Peña, E. D., & Bedore, L. M. (2010). Bilingual performance on nonword repetition in Spanish and English. *International Journal of Language and Communication Disorders*, 45(4), 480–493.
291. Sun, H., Yin, B., Amsah, N. F. B. B., & O'Brien, B. A. (2018). Differential effects of internal and external factors in early bilingual vocabulary learning: The case of Singapore. *Applied Psycholinguistics*, 39(2), 383–411.
292. Tahan, S., Cline, T., & Messaoud-Galusi, S. (2011). The relationship between language dominance and pre-reading skills in young bilingual children in Egypt. *Reading and Writing*, 24(9), 1061–1087.
293. Taura, H., & Taura, A. (2012). Linguistic and narrative development in a Japanese–English bilingual's first language acquisition: a 14-year longitudinal case study. *International Journal of Bilingual Education and Bilingualism*, 15(4), 475–508.
294. Teoh, W. Q., Brebner, C., & McCormack, P. (2012). Assessing the language skills of children from culturally and linguistically diverse backgrounds: The expressive vocabulary performance of Singaporean English–Mandarin bilingual preschoolers. *International Journal of Speech-Language Pathology*, 14(3), 281–291.
295. Thordardottir, E. (2011). The relationship between bilingual exposure and vocabulary development. *International Journal of Bilingualism*, 15(4), 426–445.
296. Thordardottir, E. (2015). The relationship between bilingual exposure and morphosyntactic development. *International Journal of Speech-Language Pathology*, 17(2), 97–114.
297. Thordardottir, E., & Brandeker, M. (2013). The effect of bilingual exposure versus language impairment on nonword repetition and sentence imitation scores. *Journal of Communication Disorders*, 46(1), 1–16.
298. Thordardottir, E., Cloutier, G., Ménard, S., Pelland-Blais, E., & Rvachew, S. (2015). Monolingual or bilingual intervention for primary language impairment? A randomized control trial. *Journal of Speech, Language, and Hearing Research*, 58(2), 287–300.
299. Tsai, K. M., Park, H., Liu, L. L., & Lau, A. S. (2012). Distinct pathways from parental cultural orientation to young children's bilingual development. *Journal of Applied Developmental Psychology*, 33(5), 219–226.
300. Uchikoshi, Y., & Marinova-Todd, S. H. (2012). Language proficiency and early literacy skills of Cantonese-speaking English language learners in the US and Canada. *Reading and Writing*, 25(9), 2107–2129.
301. Ukrainetz, T. A., Ross, C. L., & Harm, H. M. (2009). An investigation of treatment scheduling for phonemic awareness with kindergartners who are at risk for reading difficulties. *Language, Speech, and Hearing Services in Schools*, 40(1), 86–100.
302. Unsworth, S., Persson, L., Prins, T., & De Bot, K. (2015). An investigation of factors affecting early foreign language learning in the Netherlands. *Applied Linguistics*, 36(5), 527–548.
303. Vagh, S. B., Pan, B. A., & Mancilla-Martinez, J. (2009). Measuring growth in bilingual and monolingual children's English productive vocabulary development: The utility of combining parent and teacher report. *Child Development*, 80(5), 1545–1563.
304. Van Horn, D., & Kan, P. F. (2016). Fast mapping by bilingual children: Storybooks and cartoons. *Child Language Teaching and Therapy*, 32(1), 65–77.
305. Vasilyeva, M., Waterfall, H., Gámez, P. B., Gómez, L. E., Bowers, E., & Shimpi, P. (2010). Cross-linguistic syntactic priming in bilingual children. *Journal of Child Language*, 37(5), 1047–1064.
306. Vaughan, J., Wigglesworth, G., Loakes, D., Disbray, S., & Moses, K. (2015). Child-caregiver interaction in two remote Indigenous Australian communities. *Frontiers in Psychology*, 6, 1–17.

307. Vender, M., Garraffa, M., Sorace, A., & Guasti, M. T. (2016). How early L2 children perform on Italian clinical markers of SLI: A study of clitic production and nonword repetition. *Clinical Linguistics & Phonetics*, 30(2), 150–169.
308. Verhagen, J., & Leseman, P. (2016). How do verbal short-term memory and working memory relate to the acquisition of vocabulary and grammar? A comparison between first and second language learners. *Journal of Experimental Child Psychology*, 141, 65–82.
309. Verhagen, J., Leseman, P., & Messer, M. (2015). Phonological memory and the acquisition of grammar in child L2 learners. *Language Learning*, 65(2), 417–448.
310. Vu, J. A., Bailey, A. L., & Howes, C. (2010). Early cases of code-switching in Mexican-heritage children: Linguistic and socio-pragmatic considerations. *Bilingual Research Journal*, 33(2), 200–219.
311. Walsh, B. A., Rose, K. K., Sanchez, C., & Burnham, M. M. (2012). Exploration of how Spanish and English non-eliciting questions affect the novel vocabulary acquisition of Hispanic dual language learners enrolled in Head Start. *Early Childhood Education Journal*, 39(6), 383–390.
312. Weddle, S. A., Spencer, T. D., Kajian, M., & Petersen, D. B. (2016). An examination of a multitiered system of language support for culturally and linguistically diverse preschoolers: Implications for early and accurate identification. *School Psychology Review*, 45(1), 109–132.
313. Westernen, I., Halberg, A. M., Ledesma, H. M., Wold, A. H., & Oppedal, B. (2018). Effects of mother's and father's education level and age at migration on children's bilingual vocabulary. *Applied Psycholinguistics*, 1–23.
314. Westman, M., Korkman, M., Mickos, A., & Byring, R. (2008). Language profiles of monolingual and bilingual Finnish preschool children at risk for language impairment. *International Journal of Language & Communication Disorders*, 43(6), 699–711.
315. Wood, C., Diehm, E. A., & Callender, M. F. (2016). An investigation of language environment analysis measures for Spanish–English bilingual preschoolers from migrant low socioeconomic-status backgrounds. *Language, Speech, and Hearing Services in Schools*, 47(2), 123–134.
316. Woon, C. P., Yap, N. T., Lim, H. W., & Wong, B. E. (2014). Measuring grammatical development in bilingual Mandarin-English speaking children with a sentence repetition task. *Journal of Education and Learning*, 3(3), 144–157.
317. Yazejian, N., Bryant, D., Freel, K., & Burchinal, M. (2015). High-quality early education: Age of entry and time in care differences in student outcomes for English-only and dual language learners. *Early Childhood Research Quarterly*, 32, 23–39.
318. Yeong, S. H., & Rickard Liow, S. J. (2011). Cognitive–linguistic foundations of early spelling development in bilinguals. *Journal of Educational Psychology*, 103(2), 111–126.
319. Yoshida, H., Tran, D. N., Benitez, V., & Kuwabara, M. (2011). Inhibition and adjective learning in bilingual and monolingual children. *Frontiers in Psychology*, 2, 1–14.
320. Young, S. E. L., Purcell, A. A., Ballard, K. J., Liow, S. J. R., Ramos, S. D. S., & Heard, R. (2012). Bilingual children with non-syndromic cleft lip and/or palate: Language and memory skills. *Journal of Speech, Language, and Hearing Research*, 55(5), 1314–1328.
321. Yow, W. Q. (2015). Monolingual and bilingual preschoolers' use of gestures to interpret ambiguous pronouns. *Journal of Child Language*, 42(6), 1394–1407.
322. Yow, W. Q., & Markman, E. M. (2015). A bilingual advantage in how children integrate multiple cues to understand a speaker's referential intent. *Bilingualism: Language and Cognition*, 18(3), 391–399.
323. Zaretsky, E., Lange, B. P., Euler, H. A., & Neumann, K. (2013). Acquisition of German pluralization rules in monolingual and multilingual children. *Studies in Second Language Learning and Teaching*, 3(4), 551–580.
324. Zaretsky, E., Lange, B. P., Euler, H. A., & Neumann, K. (2016). Factors considered and ignored in plural acquisition: Frequency rules? *Language and Cognition*, 8(2), 283–313.
325. Ziethe, A., Eysholdt, U., & Doellinger, M. (2013). Sentence repetition and digit span: Potential markers of bilingual children with suspected SLI? *Logopedics Phoniatrics Vocology*, 38(1), 1–10.
